# Supplementary material for: An Exploratory Study to Determine Whether BRCA1 and BRCA2 Mutation Carriers Have Higher Risk of Cardiac Toxicity
Source: PubMed Central journal article supplement (PMC5333048; doi:10.3390/genes8020059), 2017-02-02
Supplement: genes-08-00059-s001.pdf [file genes-08-00059-s001.pdf]

# Cancer therapy and side effects in BRCA patients

H. Lee Moffitt Cancer Center/ FORCE

Study ID #:

Patient ID #:

For questions or comments, please contact:

Roohi Ismail-Khan, MD  
Department of Women's Oncology  
H. Lee Moffitt Cancer Center  
12902 Magnolia Drive  
Tampa, FL 33612, USA  
Telephone #: 813-745-4933  
Email Address: [roohi.ismail-khan@moffitt.org](mailto:roohi.ismail-khan@moffitt.org)

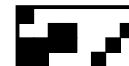

MCC # 16620

IRB # Pro00004774

**Moffitt Cancer Center / University of South Florida (USF)****Informed Consent to Participate in Research  
Information to Consider Before Taking Part in this Research Study**

You are being asked to take part in a research study. Please read this information carefully and take your time making your decision.

We are asking you to take part in a research study called: **Cancer therapy and side effects in BRCA patients.**

The person who is in charge of this research study is **Roohi Ismail-Khan, MD**. This person is called the **Principal Investigator**. However, other research staff may be involved and can act on behalf of the person in charge.

The research will be conducted at **Moffitt Cancer Center**.

The purpose of this study is to determine if BRCA carriers are at a higher risk for cardiac diseases compared to people without BRCA.

If you decide to take part in this study, you will be asked to complete the following survey. The survey asks questions about your medical history, specifically if you have had cancer or heart disease and if you have any other risk factors for these diseases. If there are questions you do not feel comfortable answering, you do not have to answer them.

You have the option of completing the survey anonymously, without providing any personal information that could identify you. Only the information you provide in the survey will be used in the research. At the end of the survey you are also given the option of providing the research team your contact information so that they can reach you for further information. Our goal is to have 400 people complete the survey.

You do not have to participate in this research study. Completing the survey is completely optional, as is providing information to be contacted later.

You will not personally benefit from being in this study, but what we learn from this study may help people with the BRCA1 mutation in the future.

This research is considered to be minimal risk. That means that the risks associated with this study are the same as what you face every day. There are no known additional risks to those who take part in this study.

**Moffitt Cancer Center Injury Statement**

In the event that you sustain an injury as a result of participating in this research, monetary compensation for damages is not automatically available. Damages are only available to the extent specified in Florida law (Florida Statute 768.28). This statute provides that damages are available only to the extent that negligent conduct of an employee caused your injuries and are limited by law. If you believe you are injured as a result of participation in this research and the negligent conduct from one of the staff conducting the study, you may notify the Risk Manager at (813) 745-4219.

You do not give up any of your legal rights by agreeing to participate.

We will not pay you for the time you volunteer while being in this study.

There is no cost to take part in this survey.

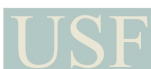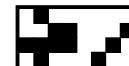

**Authorization to Use and Disclose Protected Health Information**

In this research study, we use and share your health information to the extent authorized (permitted) by you. We know that this information is private. The federal privacy regulations of the Health Insurance Portability & Accountability Act (HIPAA) protect your identifiable health information. If you authorize us to use your information we will protect it as required by the law.

Research at Moffitt Cancer Center is conducted jointly with the University of South Florida. By signing this form, you are permitting Moffitt Cancer Center and the University of South Florida to use personal health information collected about you for research purposes. You are also allowing Moffitt Cancer Center to share your personal health information with individuals or organizations other than Moffitt Cancer Center and USF who are also involved in the research and listed below.

We may publish what we find out from this study. If we do, we will not let anyone know your name. We will not publish anything else that would let people know who you are.

Federal law says we must keep your study records private. Unless you give us your name, the results of your survey will not contain information that would identify you. We will keep the records of this study private by keeping them in a locked area of the Breast Cancer Department at Moffitt Cancer Center. The following people and/or organization(s) will be allowed to disclose, use, and receive your information for the research purposes set forth in this form, but they may only use and disclose the information to the other parties on this list, to you or your personal representative, or as permitted by law:

Every research site for this study, including the Moffitt Cancer Center and University of South Florida, and each site's study team, research staff and medical staff;

Every member of the Moffitt Cancer Center and University of South Florida workforce who provides services in connection with this study;

Any federal, state or local governmental agency that regulates the study (such as the Food and Drug Administration (FDA) and Florida Department of Health (FDH));

The designated Protocol Review and Monitoring Committees, Institutional Review Boards, Privacy Boards, Data and Safety Monitoring Board and their related staff that have oversight responsibilities for this study;

The National Cancer Institute in evaluating the ongoing research of the Moffitt Cancer Center as a Comprehensive Cancer Center;

The organizations and people listed above may employ or pay various consultants and companies to help them understand, analyze and conduct this study. All of these people may not be known now, but if you would like to have more specific information about this at any time during the study, you may ask the study doctor and your questions will be answered.

Moffitt Cancer Center and the University of South Florida cannot guarantee the privacy of your information, or block further use or distribution, after the information has left MCC or USF. The sponsor of this study or others listed above may further disclose your information. If disclosed, the information may no longer be covered by federal privacy regulations.

Anyone listed above may use consultants in this research and for the purpose of this study, may share your information with them. Individuals who receive your health information for this research study may not be required by the HIPAA Privacy Rule to protect it and may share your information with others without your permission. They can only do so if permitted by the laws governing them.

By completing the survey, you authorize the use and disclosure of the information you provide in the survey. The purpose for the uses and disclosures you are authorizing is to conduct the study explained to you above and to ensure that the information relating to that study is available to all parties who may need it for research purposes.

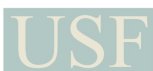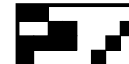

MCC # 16620

IRB # Pro00004774

By completing the survey, you authorize the use and/or disclosure of your protected health information described above. Your authorization to use your health information will never expire unless and until you expressly revoke it in writing to:

Principal Investigator's name: Roohi Ismail-Khan, MD

Address of the PI: Moffitt Cancer Center  
12902 Magnolia Drive, Mail Stop: MCC-BR Prog  
Tampa, FL 33612-9497

You should only take part in this study if you want to volunteer. You should not feel that there is any pressure to complete the survey. There will be no penalty or loss of benefits you are entitled to receive if you do not complete the survey.

If you have any questions, concerns or complaints about this study, or experience an adverse event or unanticipated problem, call Dr. Roohi Ismail-Khan at 813-745-4933.

If you have questions about your rights as a research patient at Moffitt Cancer Center, call the Division of Research Compliance in the Corporate Compliance Department at The Moffitt Cancer Center at (813) 745-1869.

If you have questions about your rights as a participant in this study, general questions, or have complaints, concerns or issues you want to discuss with someone outside the research, call the USF IRB at (813) 974-5638.

By completing the survey you are giving your consent to participate in this research study and authorization to use your anonymous information.

If you do not want to participate, **STOP HERE**

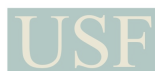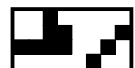

STUDY ID:

PATIENT ID:

**This is a survey to determine side effect risks for patients with BRCA mutations compared to the general population. By participating in and completing this survey, you are giving permission to the study coordinator and staff to use the information you provide anonymously for research and publication purposes. You will not be identified in any studies or publications related to this survey. (Please use a blue or black ink pen to complete the survey).**

Are you a Moffitt patient?  Yes  No

1. Are you Female?  Yes  No

2. Date of Birth? (Optional)   /   /      
 mm dd yyyy

**General Cancer History in BRCA**

3. Have you ever tested positive for the BRCA-1 gene mutation?  
 Yes  No  I don't know, but I have a strong family history of cancer

4. Have you ever tested positive for the BRCA-2 gene mutation?  
 Yes  No  I don't know but I have a strong family history of cancer

5. Have you ever been diagnosed with cancer?  Yes  No

5a. Was it breast?  Yes  No

If yes,

Was it lobular?  Yes  No

Was it ductal?  Yes  No

Was it another type?  Yes  No

If so, please specify: \_\_\_\_\_

5b. Was it ovarian?  Yes  No

5c. Was it other?  Yes  No

If so, please specify: \_\_\_\_\_

6. At diagnosis, what stage were you?  
 Stage I  Stage II  Stage III  Stage IV

7. When were you first diagnosed?   /      
 mm yyyy

**Review of Systems**

8. Did you experience any of the following side effects:

|                  | Yes                      | No                       | Don't know               |
|------------------|--------------------------|--------------------------|--------------------------|
| <b>General:</b>  |                          |                          |                          |
| Weight loss      | <input type="checkbox"/> | <input type="checkbox"/> | <input type="checkbox"/> |
| Weight gain      | <input type="checkbox"/> | <input type="checkbox"/> | <input type="checkbox"/> |
| Fatigue          | <input type="checkbox"/> | <input type="checkbox"/> | <input type="checkbox"/> |
| Fever            | <input type="checkbox"/> | <input type="checkbox"/> | <input type="checkbox"/> |
| Night sweats     | <input type="checkbox"/> | <input type="checkbox"/> | <input type="checkbox"/> |
| Loss of appetite | <input type="checkbox"/> | <input type="checkbox"/> | <input type="checkbox"/> |

STUDY ID:

PATIENT ID:

|                                        | Yes                      | No                       | Don't know               |
|----------------------------------------|--------------------------|--------------------------|--------------------------|
| <b>Skin:</b>                           |                          |                          |                          |
| Rash                                   | <input type="checkbox"/> | <input type="checkbox"/> | <input type="checkbox"/> |
| Itching                                | <input type="checkbox"/> | <input type="checkbox"/> | <input type="checkbox"/> |
| Hair Loss                              | <input type="checkbox"/> | <input type="checkbox"/> | <input type="checkbox"/> |
| Nail changes                           | <input type="checkbox"/> | <input type="checkbox"/> | <input type="checkbox"/> |
| <b>Breast:</b>                         |                          |                          |                          |
| Breast tenderness                      | <input type="checkbox"/> | <input type="checkbox"/> | <input type="checkbox"/> |
| Breast swelling                        | <input type="checkbox"/> | <input type="checkbox"/> | <input type="checkbox"/> |
| Nipple discharge                       | <input type="checkbox"/> | <input type="checkbox"/> | <input type="checkbox"/> |
| <b>HEENT:</b>                          |                          |                          |                          |
| Headaches                              | <input type="checkbox"/> | <input type="checkbox"/> | <input type="checkbox"/> |
| Vertigo                                | <input type="checkbox"/> | <input type="checkbox"/> | <input type="checkbox"/> |
| Lightheadedness                        | <input type="checkbox"/> | <input type="checkbox"/> | <input type="checkbox"/> |
| Vision changes                         | <input type="checkbox"/> | <input type="checkbox"/> | <input type="checkbox"/> |
| Nose bleeding/drainage                 | <input type="checkbox"/> | <input type="checkbox"/> | <input type="checkbox"/> |
| Frequent colds                         | <input type="checkbox"/> | <input type="checkbox"/> | <input type="checkbox"/> |
| Dental difficulties                    | <input type="checkbox"/> | <input type="checkbox"/> | <input type="checkbox"/> |
| Mouth pain                             | <input type="checkbox"/> | <input type="checkbox"/> | <input type="checkbox"/> |
| Trouble swallowing                     | <input type="checkbox"/> | <input type="checkbox"/> | <input type="checkbox"/> |
| <b>Cardiac:</b>                        |                          |                          |                          |
| Chest pain                             | <input type="checkbox"/> | <input type="checkbox"/> | <input type="checkbox"/> |
| Irregular rhythm                       | <input type="checkbox"/> | <input type="checkbox"/> | <input type="checkbox"/> |
| Palpitations/racing heart              | <input type="checkbox"/> | <input type="checkbox"/> | <input type="checkbox"/> |
| Trouble breathing/shortness of breath? | <input type="checkbox"/> | <input type="checkbox"/> | <input type="checkbox"/> |
| If so, was it worse with exertion?     | <input type="checkbox"/> | <input type="checkbox"/> | <input type="checkbox"/> |
| Leg swelling                           | <input type="checkbox"/> | <input type="checkbox"/> | <input type="checkbox"/> |
| Prior heart attack                     | <input type="checkbox"/> | <input type="checkbox"/> | <input type="checkbox"/> |
| Heart failure                          | <input type="checkbox"/> | <input type="checkbox"/> | <input type="checkbox"/> |
| History of high blood pressure         | <input type="checkbox"/> | <input type="checkbox"/> | <input type="checkbox"/> |
| History of heart surgery               | <input type="checkbox"/> | <input type="checkbox"/> | <input type="checkbox"/> |
| <b>Lungs:</b>                          |                          |                          |                          |
| Wheezing                               | <input type="checkbox"/> | <input type="checkbox"/> | <input type="checkbox"/> |
| Cough                                  | <input type="checkbox"/> | <input type="checkbox"/> | <input type="checkbox"/> |
| Any sputum?                            | <input type="checkbox"/> | <input type="checkbox"/> | <input type="checkbox"/> |
| Any blood?                             | <input type="checkbox"/> | <input type="checkbox"/> | <input type="checkbox"/> |
| <b>GI:</b>                             |                          |                          |                          |
| Abdominal pain                         | <input type="checkbox"/> | <input type="checkbox"/> | <input type="checkbox"/> |
| Heartburn                              | <input type="checkbox"/> | <input type="checkbox"/> | <input type="checkbox"/> |
| Nausea                                 | <input type="checkbox"/> | <input type="checkbox"/> | <input type="checkbox"/> |
| Vomiting                               | <input type="checkbox"/> | <input type="checkbox"/> | <input type="checkbox"/> |
| Constipation                           | <input type="checkbox"/> | <input type="checkbox"/> | <input type="checkbox"/> |
| Diarrhea                               | <input type="checkbox"/> | <input type="checkbox"/> | <input type="checkbox"/> |

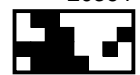

STUDY ID:

PATIENT ID:

|                                                                                                     | Yes                                                                                                          | No                                                                                                           | Don't know                                                                                                   |
|-----------------------------------------------------------------------------------------------------|--------------------------------------------------------------------------------------------------------------|--------------------------------------------------------------------------------------------------------------|--------------------------------------------------------------------------------------------------------------|
| <b>GU:</b><br>Trouble urinating<br>Loss of libido<br>Change in menstruation                         | <input type="checkbox"/><br><input type="checkbox"/><br><input type="checkbox"/>                             | <input type="checkbox"/><br><input type="checkbox"/><br><input type="checkbox"/>                             | <input type="checkbox"/><br><input type="checkbox"/><br><input type="checkbox"/>                             |
| <b>Musculoskeletal:</b><br>Pain in muscles<br>Arthritis/ joint pain                                 | <input type="checkbox"/><br><input type="checkbox"/>                                                         | <input type="checkbox"/><br><input type="checkbox"/>                                                         | <input type="checkbox"/><br><input type="checkbox"/>                                                         |
| <b>Neuro:</b><br>Stroke<br>Weakness in extremities<br>Tremor<br>Numbness or tingling in extremities | <input type="checkbox"/><br><input type="checkbox"/><br><input type="checkbox"/><br><input type="checkbox"/> | <input type="checkbox"/><br><input type="checkbox"/><br><input type="checkbox"/><br><input type="checkbox"/> | <input type="checkbox"/><br><input type="checkbox"/><br><input type="checkbox"/><br><input type="checkbox"/> |
| <b>Psych:</b><br>Anxiety<br>Depression                                                              | <input type="checkbox"/><br><input type="checkbox"/>                                                         | <input type="checkbox"/><br><input type="checkbox"/>                                                         | <input type="checkbox"/><br><input type="checkbox"/>                                                         |
| <b>Hematologic:</b><br>Anemia<br>Bleeding tendency<br>Easy bruising                                 | <input type="checkbox"/><br><input type="checkbox"/><br><input type="checkbox"/>                             | <input type="checkbox"/><br><input type="checkbox"/><br><input type="checkbox"/>                             | <input type="checkbox"/><br><input type="checkbox"/><br><input type="checkbox"/>                             |

**GYN (FEMALES ONLY)**

9. What age did you start having periods?

10. Are you:

- Pre-menopausal (I still have regular menses)
- Peri-menopausal (I am going through the process)
- Post-menopausal (My menses have stopped)
- Surgical menopausal (both ovaries were removed by surgery)
- Status post hysterectomy (ovaries have not been removed but uterus was removed)
- Other

10a. What age did you start experiencing menopause?

11. Were you ever on oral birth control?  Yes  No

11a. If yes, how many years?

12. Were you ever on hormonal therapy such as estrogen or progesterone replacements?  Yes  No

12a. If yes,

- Was it pills?  Yes  No
- Was it cream?  Yes  No

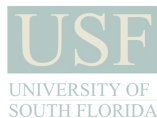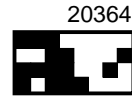

STUDY ID:

PATIENT ID:

- 13. How many times have you been pregnant?
- 14. How many live births have you had?

**Social History**

- 15. Did you smoke cigarettes at the time of diagnosis?  Yes  No
- 16. Do you smoke now?  Yes  No
- 17. Do you/did you drink alcohol?  Yes  No
  - 17a. If yes, how often:
    - less than 5 drinks per week
    - 5-10 drinks per week
    - 10-15 drinks per week
    - more than 15 drinks per week
- 18. How much did you weigh at the time of diagnosis? \_\_\_\_\_ lbs
- 19. How much do you weigh now? \_\_\_\_\_ lbs
- 20. How tall are you? \_\_\_\_\_ ft \_\_\_\_\_ inches
- 21. How often do you exercise?
  - less than 3 times per week
  - 3-5 times per week
  - more than 5 times per week
- 22. Do you work ?  Part time  Full time  Unemployed  Retired
- 23. Are you disabled?  Yes  No

**Cardiac Risk Factors/ Cardiac History**

- 25. Was your heart function normal before starting treatment?  Yes  No  I don't know
- 26. Is your heart function normal now?  Yes  No  I don't know
- 27. Did you have an echocardiogram?  Yes  No  I don't know
- 28. Did you have a multi-gated acquisition (MUGA) scan?  Yes  No  I don't know
- 29. Was your LDL cholesterol greater than 130 at the time of diagnosis?  Yes  No  I don't know
- 30. Is your LDL cholesterol greater than 130 now?  Yes  No  I don't know
- 31. Was your HDL cholesterol less than 40 at the time of diagnosis?  Yes  No  I don't know
- 32. Is your HDL cholesterol less than 40 now?  Yes  No  I don't know
- 33. Were you on cholesterol medications at the time of diagnosis?  Yes  No  I don't know

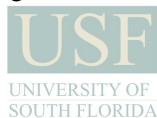





STUDY ID:

PATIENT ID:

**Treatment**

47. Were you initially treated with chemotherapy?  Yes  No  I don't know

47a. Do you know what chemotherapy was used?

| Did you receive.....                            | Date                 |                      |                      | How many cycles      |
|-------------------------------------------------|----------------------|----------------------|----------------------|----------------------|
|                                                 | mm                   | dd                   | yyyy                 |                      |
| <input type="checkbox"/> Adriamycin/doxorubicin | <input type="text"/> | <input type="text"/> | <input type="text"/> | <input type="text"/> |
| <input type="checkbox"/> Cytosan                | <input type="text"/> | <input type="text"/> | <input type="text"/> | <input type="text"/> |
| <input type="checkbox"/> AC                     | <input type="text"/> | <input type="text"/> | <input type="text"/> | <input type="text"/> |
| <input type="checkbox"/> Taxol/Paclitaxel       | <input type="text"/> | <input type="text"/> | <input type="text"/> | <input type="text"/> |
| <input type="checkbox"/> Taxotere/docetaxel     | <input type="text"/> | <input type="text"/> | <input type="text"/> | <input type="text"/> |
| <input type="checkbox"/> 5-Fu/Fluorouracil      | <input type="text"/> | <input type="text"/> | <input type="text"/> | <input type="text"/> |
| <input type="checkbox"/> Epirubicin             | <input type="text"/> | <input type="text"/> | <input type="text"/> | <input type="text"/> |
| <input type="checkbox"/> FEC                    | <input type="text"/> | <input type="text"/> | <input type="text"/> | <input type="text"/> |
| <input type="checkbox"/> Methotrexate           | <input type="text"/> | <input type="text"/> | <input type="text"/> | <input type="text"/> |
| <input type="checkbox"/> CMF                    | <input type="text"/> | <input type="text"/> | <input type="text"/> | <input type="text"/> |
| <input type="checkbox"/> Other _____            | <input type="text"/> | <input type="text"/> | <input type="text"/> | <input type="text"/> |

48. Did you receive hormonal therapy?  Yes  No  I don't know

48a. Do you know which hormonal therapy was used?

| Did you receive.....                            | Date                 |                      |                      | How many years       |
|-------------------------------------------------|----------------------|----------------------|----------------------|----------------------|
|                                                 | mm                   | dd                   | yyyy                 |                      |
| <input type="checkbox"/> Tamoxifen              | <input type="text"/> | <input type="text"/> | <input type="text"/> | <input type="text"/> |
| <input type="checkbox"/> Arimidex (Anastrozole) | <input type="text"/> | <input type="text"/> | <input type="text"/> | <input type="text"/> |
| <input type="checkbox"/> Femara (Letrozole)     | <input type="text"/> | <input type="text"/> | <input type="text"/> | <input type="text"/> |
| <input type="checkbox"/> Faslodex               | <input type="text"/> | <input type="text"/> | <input type="text"/> | <input type="text"/> |
| <input type="checkbox"/> Aromasin (Exemestane)  | <input type="text"/> | <input type="text"/> | <input type="text"/> | <input type="text"/> |
| <input type="checkbox"/> Other _____            | <input type="text"/> | <input type="text"/> | <input type="text"/> | <input type="text"/> |

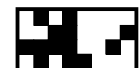

STUDY ID:

PATIENT ID:

49. Did you receive radiation?  Yes  No  I don't know

If yes:

49a. Was it only to the primary tumor?  Yes  No  I don't know Length of Treatment

If **YES**, when?   /   /      years  
mm dd yyyy

49b. Was it to the bone?  Yes  No  I don't know Length of Treatment

If **YES**, when?   /   /      years  
mm dd yyyy

49c. Was it to another organ?  Yes  No  I don't know Length of Treatment

(please specify)

If **YES**, when?   /   /      years  
mm dd yyyy

50. Did you receive surgery?  Yes  No  I don't know

If yes:

50a. Was it a lumpectomy?  Yes  No  I don't know

If **YES**, when?   /   /       
mm dd yyyy

50b. Was it mastectomy?  Yes  No  I don't know

If **YES**, when?   /   /       
mm dd yyyy

50c. Was it another type?  Yes  No  I don't know

(please specify)

If **YES**, when?   /   /       
mm dd yyyy

50d. Did you have an excisional biopsy?  Yes  No  I don't know

If **YES**, when?   /   /       
mm dd yyyy

50e. Did you have a sentinel lymph node biopsy?  Yes  No  I don't know

If **YES**, when?   /   /       
mm dd yyyy

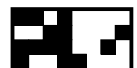

STUDY ID:

PATIENT ID:

50f. Did you have a lymph node dissection?  Yes  No  I don't know If **YES**, when?  
 If so, how many lymph nodes were removed?   /   /      
 How many lymph nodes were involved with cancer?   mm dd yyyy

**Metastatic Disease**

51. Did you have recurrence or metastasis of your cancer (same type as original)?  Yes  No  I don't know

51a. Was it in your bone?  Yes  No  I don't know  
 If **YES**, when?   /   /      
 mm dd yyyy

51b. Was it in your liver?  Yes  No  I don't know  
 If **YES**, when?   /   /      
 mm dd yyyy

51c. Was it somewhere else?  Yes  No  I don't know  
 \_\_\_\_\_ (please specify)  
 If **YES**, when?   /   /      
 mm dd yyyy

52. Did you develop a second cancer?  Yes  No  I don't know

52a. Was it breast?  Yes  No  I don't know  
 If **YES**, when?   /   /      
 mm dd yyyy

52b. Was it lobular?  Yes  No  I don't know  
 If **YES**, when?   /   /      
 mm dd yyyy

52c. Was it ductal?  Yes  No  I don't know  
 If **YES**, when?   /   /      
 mm dd yyyy

52d. Was it another type?  Yes  No  I don't know  
 \_\_\_\_\_ (please specify)  
 If **YES**, when?   /   /      
 mm dd yyyy

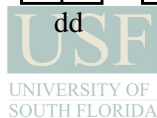

STUDY ID:

PATIENT ID:

52e. Was it ovarian? (**Females only**)

Yes  No  I don't know

If **YES**, when?

/  /   
mm dd yyyy

52f. Was it colon?

Yes  No  I don't know

If **YES**, when?

/  /   
mm dd yyyy

52g. Was it another type?

Yes  No  I don't know

(please specify)

If **YES**, when?

/  /   
mm dd yyyy

**Treatment of metastatic or new malignancy**

53. Are you currently being treated for cancer?

Yes  No

If yes, when did you start?

/   
mm yyyy

54. Are you being treated with chemotherapy?

Yes  No

If yes, when did you start?

/   
mm yyyy

55. Are you being treated with hormonal therapy?

Yes  No

If yes, when did you start?

/   
mm yyyy

56. Do you know what chemotherapy is being used? \_\_\_\_\_

57. Are you receiving radiation?

Yes  No  I don't know

If **YES**, when did it start?

/  /   
mm dd yyyy

Length of treatment

57a. Is it only to the primary tumor?

Yes  No  I don't know

If **YES**, when did it start?

/  /   
mm dd yyyy

57b. Is it to bone?

Yes  No  I don't know

If **YES**, when did it start?

/  /   
mm dd yyyy

57c. Is it to another organ?

Yes  No  I don't know

(please specify)

If **YES**, when did it start?

/  /   
mm dd yyyy

STUDY ID:

PATIENT ID:

Thank you for completing the questionnaire. Please provide the following contact information so we can reach you for further information if necessary. Please note that if you decide to complete this section, our study will not identify you by name but by study number. All of your information will be kept confidential.

Name: \_\_\_\_\_

Phone Number:  -  -

Email address: \_\_\_\_\_

Best time to be contacted:    Early Morning    Late Morning    Afternoon    Evening    Night time  
**(Please circle one)**
